# Supplementary material
Source: publisher figshare collection journal article supplement (https://acs.figshare.com/ndownloader/files/5080099)
Supplement: Supplementary file 1 [file 5080099]

 
data_1,3-bis(3-pyridyl)urea 
 
_audit_creation_method            SHELXL-97 
_chemical_name_systematic 
; 
 1,3-bis(3-pyridyl)urea 
; 
_chemical_name_common             '1,3-bis(3-pyridyl)urea' 
_chemical_melting_point           499K 
_chemical_formula_moiety           'C11 H10 N4 O'  
_chemical_formula_sum 
 'C11 H10 N4 O' 
_chemical_formula_weight          214.23 
 
loop_ 
 _atom_type_symbol 
 _atom_type_description 
 _atom_type_scat_dispersion_real 
 _atom_type_scat_dispersion_imag 
 _atom_type_scat_source 
 'C'  'C'   0.0033   0.0016 
 'International Tables Vol C Tables 4.2.6.8 and 6.1.1.4' 
 'H'  'H'   0.0000   0.0000 
 'International Tables Vol C Tables 4.2.6.8 and 6.1.1.4' 
 'N'  'N'   0.0061   0.0033 
 'International Tables Vol C Tables 4.2.6.8 and 6.1.1.4' 
 'O'  'O'   0.0106   0.0060 
 'International Tables Vol C Tables 4.2.6.8 and 6.1.1.4' 
 
_symmetry_cell_setting            'Orthorhombic' 
_symmetry_space_group_name_H-M     'A b a 2'
_symmetry_space_group_name_Hall   'A 2 -2ac'  
 
loop_ 
 _symmetry_equiv_pos_as_xyz 
 'x, y, z' 
 '-x, -y, z' 
 'x+1/2, -y+1/2, z' 
 '-x+1/2, y+1/2, z' 
 'x, y+1/2, z+1/2' 
 '-x, -y+1/2, z+1/2' 
 'x+1/2, -y+1, z+1/2' 
 '-x+1/2, y+1, z+1/2' 
 
_cell_length_a                    13.707(3) 
_cell_length_b                    7.0140(14) 
_cell_length_c                    10.006(2) 
_cell_angle_alpha                 90.00 
_cell_angle_beta                  90.00 
_cell_angle_gamma                 90.00 
_cell_volume                      962.0(3) 
_cell_formula_units_Z             4 
_cell_measurement_temperature     293(2) 
_cell_measurement_reflns_used     250 
_cell_measurement_theta_min       10.1 
_cell_measurement_theta_max       18.8 
 
_exptl_crystal_description        'plate' 
_exptl_crystal_colour             'colourless'  
_exptl_crystal_size_max           0.32 
_exptl_crystal_size_mid           0.18 
_exptl_crystal_size_min           0.08 
_exptl_crystal_density_meas       ? 
_exptl_crystal_density_diffrn     1.479 
_exptl_crystal_density_method     'not measured' 
_exptl_crystal_F_000              448 
_exptl_absorpt_coefficient_mu     0.101 
_exptl_absorpt_correction_type    'none' 
_exptl_absorpt_correction_T_min   ? 
_exptl_absorpt_correction_T_max   ? 
_exptl_absorpt_process_details    ? 
 
_exptl_special_details 
; 
 ? 
; 
 
_diffrn_ambient_temperature       293(2) 
_diffrn_radiation_wavelength      0.71073 
_diffrn_radiation_type            MoK\a 
_diffrn_radiation_source          'rotating anode'  
_diffrn_radiation_monochromator   graphite 
_diffrn_measurement_device_type   'Nonius FAST area detector'  
_diffrn_measurement_method        'box integration' 
_diffrn_detector_area_resol_mean  ? 
_diffrn_standards_number          ? 
_diffrn_standards_interval_count  ? 
_diffrn_standards_interval_time   ? 
_diffrn_standards_decay_%         ? 
_diffrn_reflns_number             575 
_diffrn_reflns_av_R_equivalents   0.0000 
_diffrn_reflns_av_sigmaI/netI     0.0181 
_diffrn_reflns_limit_h_min        -17 
_diffrn_reflns_limit_h_max        0 
_diffrn_reflns_limit_k_min        0 
_diffrn_reflns_limit_k_max        9 
_diffrn_reflns_limit_l_min        -12 
_diffrn_reflns_limit_l_max        0 
_diffrn_reflns_theta_min          2.97 
_diffrn_reflns_theta_max          27.45 
_reflns_number_total              575 
_reflns_number_gt                 518 
_reflns_threshold_expression      >2sigma(I) 
 
_computing_data_collection        'MADNES-Messerschmidt & Pflugrath'   
_computing_cell_refinement        'MADNES-Messerschmidt & Pflugrath'   
_computing_data_reduction         'MADNES-Messerschmidt & Pflugrath'   
_computing_structure_solution     'SHELXS-97 (Sheldrick, 1990)' 
_computing_structure_refinement   'SHELXL-97 (Sheldrick, 1997)' 
_computing_molecular_graphics     ? 
_computing_publication_material   ? 
 
_refine_special_details 
; 
 Refinement of F^2^ against ALL reflections.  The weighted R-factor wR and 
 goodness of fit S are based on F^2^, conventional R-factors R are based 
 on F, with F set to zero for negative F^2^. The threshold expression of 
 F^2^ > 2sigma(F^2^) is used only for calculating R-factors(gt) etc. and is 
 not relevant to the choice of reflections for refinement.  R-factors based 
 on F^2^ are statistically about twice as large as those based on F, and R- 
 factors based on ALL data will be even larger. 
; 
 
_refine_ls_structure_factor_coef  Fsqd  
_refine_ls_matrix_type            full 
_refine_ls_weighting_scheme       calc  
_refine_ls_weighting_details 
 'calc w=1/[\s^2^(Fo^2^)+(0.0467P)^2^+1.4680P] where P=(Fo^2^+2Fc^2^)/3' 
_atom_sites_solution_primary      direct 
_atom_sites_solution_secondary    difmap 
_atom_sites_solution_hydrogens    geom 
_refine_ls_hydrogen_treatment     mixed 
_refine_ls_extinction_method      none 
_refine_ls_extinction_coef        ? 
_refine_ls_abs_structure_details 
 'Flack H D (1983), Acta Cryst. A39, 876-881' 
_refine_ls_abs_structure_Flack    -1(4) 
_refine_ls_number_reflns          575 
_refine_ls_number_parameters      78 
_refine_ls_number_restraints      1 
_refine_ls_R_factor_all           0.0498 
_refine_ls_R_factor_gt            0.0437 
_refine_ls_wR_factor_ref          0.1068 
_refine_ls_wR_factor_gt           0.1021 
_refine_ls_goodness_of_fit_ref    1.135 
_refine_ls_restrained_S_all       1.133 
_refine_ls_shift/su_max           0.000 
_refine_ls_shift/su_mean          0.000 
 
loop_ 
 _atom_site_label 
 _atom_site_type_symbol 
 _atom_site_fract_x 
 _atom_site_fract_y 
 _atom_site_fract_z 
 _atom_site_U_iso_or_equiv 
 _atom_site_adp_type 
 _atom_site_occupancy 
 _atom_site_symmetry_multiplicity 
 _atom_site_calc_flag 
 _atom_site_refinement_flags 
 _atom_site_disorder_assembly 
 _atom_site_disorder_group 
N1 N 0.45059(19) 0.1328(4) 0.6416(3) 0.0187(6) Uani 1 1 d . . . 
C1 C 0.5000 0.0000 0.5665(4) 0.0176(9) Uani 1 2 d S . . 
O1 O 0.5000 0.0000 0.4449(3) 0.0253(8) Uani 1 2 d S . . 
C5 C 0.3302(2) 0.6402(5) 0.5062(3) 0.0221(7) Uani 1 1 d . . . 
H5 H 0.3035 0.7546 0.4769 0.026 Uiso 1 1 calc R . . 
N2 N 0.36905(18) 0.5224(4) 0.4159(3) 0.0217(6) Uani 1 1 d . . . 
C4 C 0.3280(2) 0.5994(5) 0.6414(3) 0.0226(7) Uani 1 1 d . . . 
H4 H 0.2996 0.6840 0.7014 0.027 Uiso 1 1 calc R . . 
C3 C 0.3690(2) 0.4292(5) 0.6861(3) 0.0202(7) Uani 1 1 d . . . 
H3 H 0.3698 0.4001 0.7768 0.024 Uiso 1 1 calc R . . 
C6 C 0.4063(2) 0.3553(4) 0.4581(3) 0.0191(6) Uani 1 1 d . . . 
H6 H 0.4314 0.2714 0.3948 0.023 Uiso 1 1 calc R . . 
C2 C 0.4091(2) 0.3024(4) 0.5928(3) 0.0169(6) Uani 1 1 d . . . 
H1 H 0.437(3) 0.109(6) 0.729(5) 0.032(11) Uiso 1 1 d . . . 
 
loop_ 
 _atom_site_aniso_label 
 _atom_site_aniso_U_11 
 _atom_site_aniso_U_22 
 _atom_site_aniso_U_33 
 _atom_site_aniso_U_23 
 _atom_site_aniso_U_13 
 _atom_site_aniso_U_12 
N1 0.0240(12) 0.0167(13) 0.0154(11) 0.0009(11) 0.0011(11) 0.0005(10) 
C1 0.0193(18) 0.018(2) 0.015(2) 0.000 0.000 -0.0042(17) 
O1 0.0349(17) 0.0242(17) 0.0168(18) 0.000 0.000 0.0031(14) 
C5 0.0180(14) 0.0224(15) 0.0258(16) 0.0077(15) 0.0030(13) 0.0057(12) 
N2 0.0235(13) 0.0238(14) 0.0176(12) 0.0044(12) 0.0000(12) 0.0028(11) 
C4 0.0221(15) 0.0236(16) 0.0221(15) 0.0002(14) 0.0049(14) 0.0020(13) 
C3 0.0193(14) 0.0234(16) 0.0179(13) 0.0033(13) 0.0001(12) -0.0013(13) 
C6 0.0208(14) 0.0200(15) 0.0165(14) 0.0023(13) 0.0009(11) 0.0004(12) 
C2 0.0143(13) 0.0197(15) 0.0167(13) 0.0015(13) -0.0004(11) -0.0023(11) 
 
_geom_special_details 
; 
 All esds (except the esd in the dihedral angle between two l.s. planes) 
 are estimated using the full covariance matrix.  The cell esds are taken 
 into account individually in the estimation of esds in distances, angles 
 and torsion angles; correlations between esds in cell parameters are only 
 used when they are defined by crystal symmetry.  An approximate (isotropic) 
 treatment of cell esds is used for estimating esds involving l.s. planes. 
; 
 
loop_ 
 _geom_bond_atom_site_label_1 
 _geom_bond_atom_site_label_2 
 _geom_bond_distance 
 _geom_bond_site_symmetry_2 
 _geom_bond_publ_flag 
N1 C1 1.375(3) . ? 
N1 C2 1.406(4) . ? 
N1 H1 0.91(5) . ? 
C1 O1 1.217(5) . ? 
C1 N1 1.375(3) 2_655 ? 
C5 N2 1.335(4) . ? 
C5 C4 1.383(5) . ? 
C5 H5 0.9300 . ? 
N2 C6 1.346(4) . ? 
C4 C3 1.393(5) . ? 
C4 H4 0.9300 . ? 
C3 C2 1.401(5) . ? 
C3 H3 0.9300 . ? 
C6 C2 1.399(4) . ? 
C6 H6 0.9300 . ? 
 
loop_ 
 _geom_angle_atom_site_label_1 
 _geom_angle_atom_site_label_2 
 _geom_angle_atom_site_label_3 
 _geom_angle 
 _geom_angle_site_symmetry_1 
 _geom_angle_site_symmetry_3 
 _geom_angle_publ_flag 
C1 N1 C2 125.7(3) . . ? 
C1 N1 H1 120(3) . . ? 
C2 N1 H1 114(3) . . ? 
O1 C1 N1 123.10(18) . . ? 
O1 C1 N1 123.11(18) . 2_655 ? 
N1 C1 N1 113.8(4) . 2_655 ? 
N2 C5 C4 122.9(3) . . ? 
N2 C5 H5 118.6 . . ? 
C4 C5 H5 118.6 . . ? 
C5 N2 C6 118.6(3) . . ? 
C5 C4 C3 118.8(3) . . ? 
C5 C4 H4 120.6 . . ? 
C3 C4 H4 120.6 . . ? 
C4 C3 C2 119.2(3) . . ? 
C4 C3 H3 120.4 . . ? 
C2 C3 H3 120.4 . . ? 
N2 C6 C2 122.9(3) . . ? 
N2 C6 H6 118.6 . . ? 
C2 C6 H6 118.6 . . ? 
C6 C2 C3 117.6(3) . . ? 
C6 C2 N1 124.7(3) . . ? 
C3 C2 N1 117.7(3) . . ? 
 
_diffrn_measured_fraction_theta_max    0.985 
_diffrn_reflns_theta_full              27.45 
_diffrn_measured_fraction_theta_full   0.985 
_refine_diff_density_max    0.260 
_refine_diff_density_min   -0.246 
_refine_diff_density_rms    0.058 
